# Supplementary material
Source: HighWire-hosted journal article supplement (http://jpet.aspetjournals.org/highwire/filestream/143805/field_highwire_adjunct_files/0/252940SupplementalData.pdf)
Supplement: 252940SupplementalData.pdf [file 252940SupplementalData.pdf]

JPET #252940

Yiting Wang, Liang Yan, Jingyang Liu, Shitong Chen, Guangming Liu, Yali Nie, Pei Wang, Weihong Yang, Liming Chen, Xiaobo Zhong, Shengna Han, and Lirong Zhang

The HNF1 $\alpha$ -regulated lncRNA HNF1 $\alpha$ -AS1 is Involved in the Regulation of Cytochrome P450 Expression in Human Liver Tissues and Huh7 Cells

The Journal of Pharmacology and Experimental Therapeutics

**Supplemental Table S1. Primers for RT-qPCR**

| Gene               | Forward primer          | Reverse primer          |
|--------------------|-------------------------|-------------------------|
| CYP1A2             | GGTGGAGGTAGGAGCAACAC    | CTAGCAGGGACAAACAGCCT    |
| CYP2E1             | TTCTCCTAGGGCACAGTCGT    | AGGGAAGGTACTGCCTCTGA    |
| CYP2B6             | GGAGTAGAGGCCATACGGGA    | AGGAAGGTGGCGTCCATGAG    |
| CYP2D6             | CTAAGGGAACGACTCATCAC    | CTCACCAGGAAAGCAAAGACAC  |
| CYP2C8             | GGACTTTATGGATTGCTTCCTG  | CCATATCTCAGAGTGGTGCTTG  |
| CYP2C9             | ACTTTCTGGATGAAGGTGGC    | GTGCAAAGATGGATAATGCC    |
| CYP2C19            | GAACACCAAGAATCGATGGACA  | TCAGCAGGAGAAGGAGAGCATA  |
| CYP3A4             | CCCTTTGGAAGTGGACCCAG    | ACGGTGCCATCCCTTGACTC    |
| HNF1 $\alpha$      | TGGGTCCTACGTTACCAAC     | TCTGCACAGGTGGCATGAGC    |
| HNF1 $\alpha$ -AS1 | AAAGGACCTGGGTCTGCATTC   | GTTGACAGGAGCAAACTGCTAAG |
| AhR                | ACATCACCTACGCCAGTCGC    | TCTATGCCGCTTGGAAGGAT    |
| CAR                | TGATCAGCTGCAAGAGGAGA    | AGGCCTAGCAACTTCGCATA    |
| PXR                | CAACCTACATGTTCAAAGGCATC | ACACTCCCAGGTTCCAGTCTC   |
| GAPDH              | GCACCGTCAAGGCTGAGAAC    | TGGTGAAGACGCCAGTGGA     |

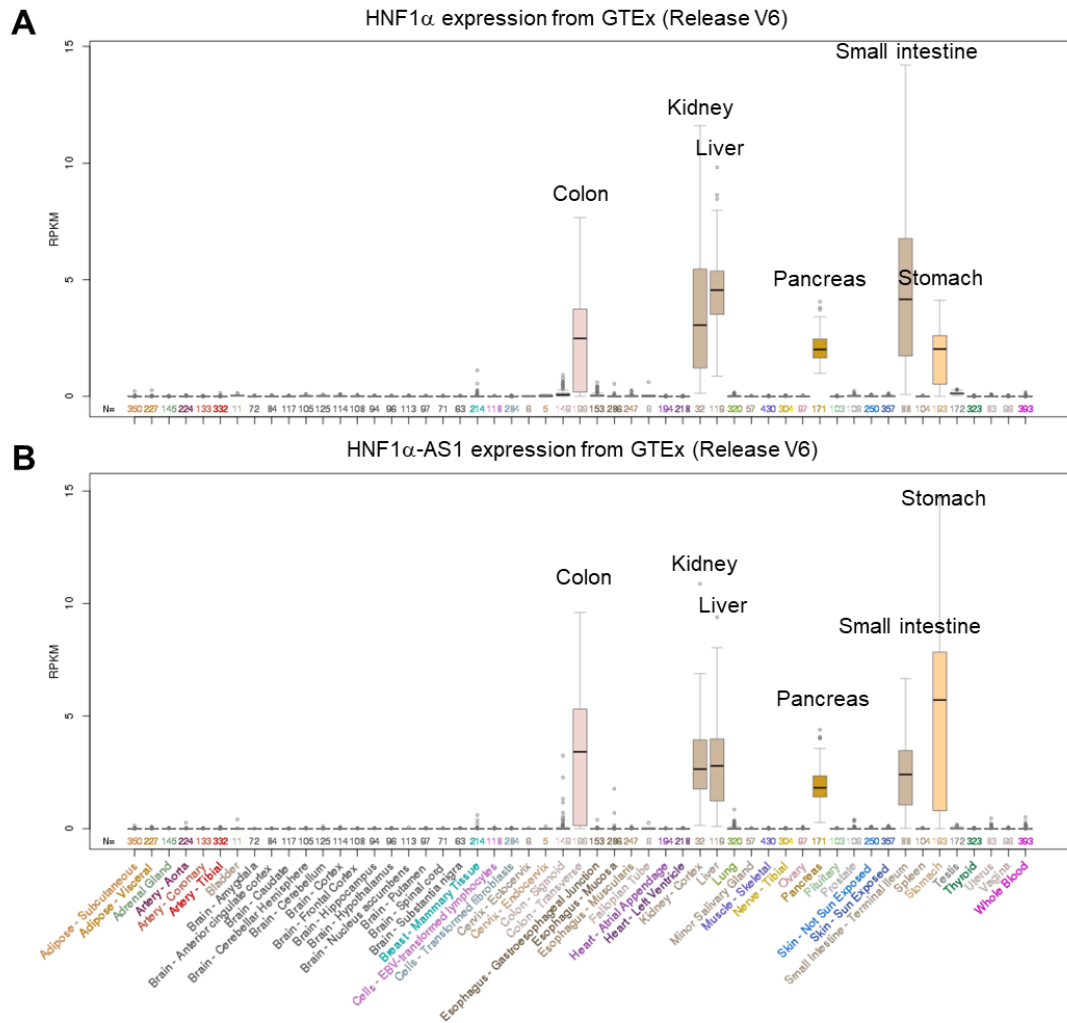

**Supplemental Fig. S1.** The tissue-specific expression patterns of HNF1 $\alpha$  mRNA (A) and HNF1 $\alpha$ -AS1 RNA (B). The data are retrieved from the Gene Expression GTEx database from UCSC. mRNA levels of genes were quantified by RNA-Seq and presented as mean  $\pm$  SD of RPKM (reads per kilobase per million) across 53 human tissues from 714 donors.

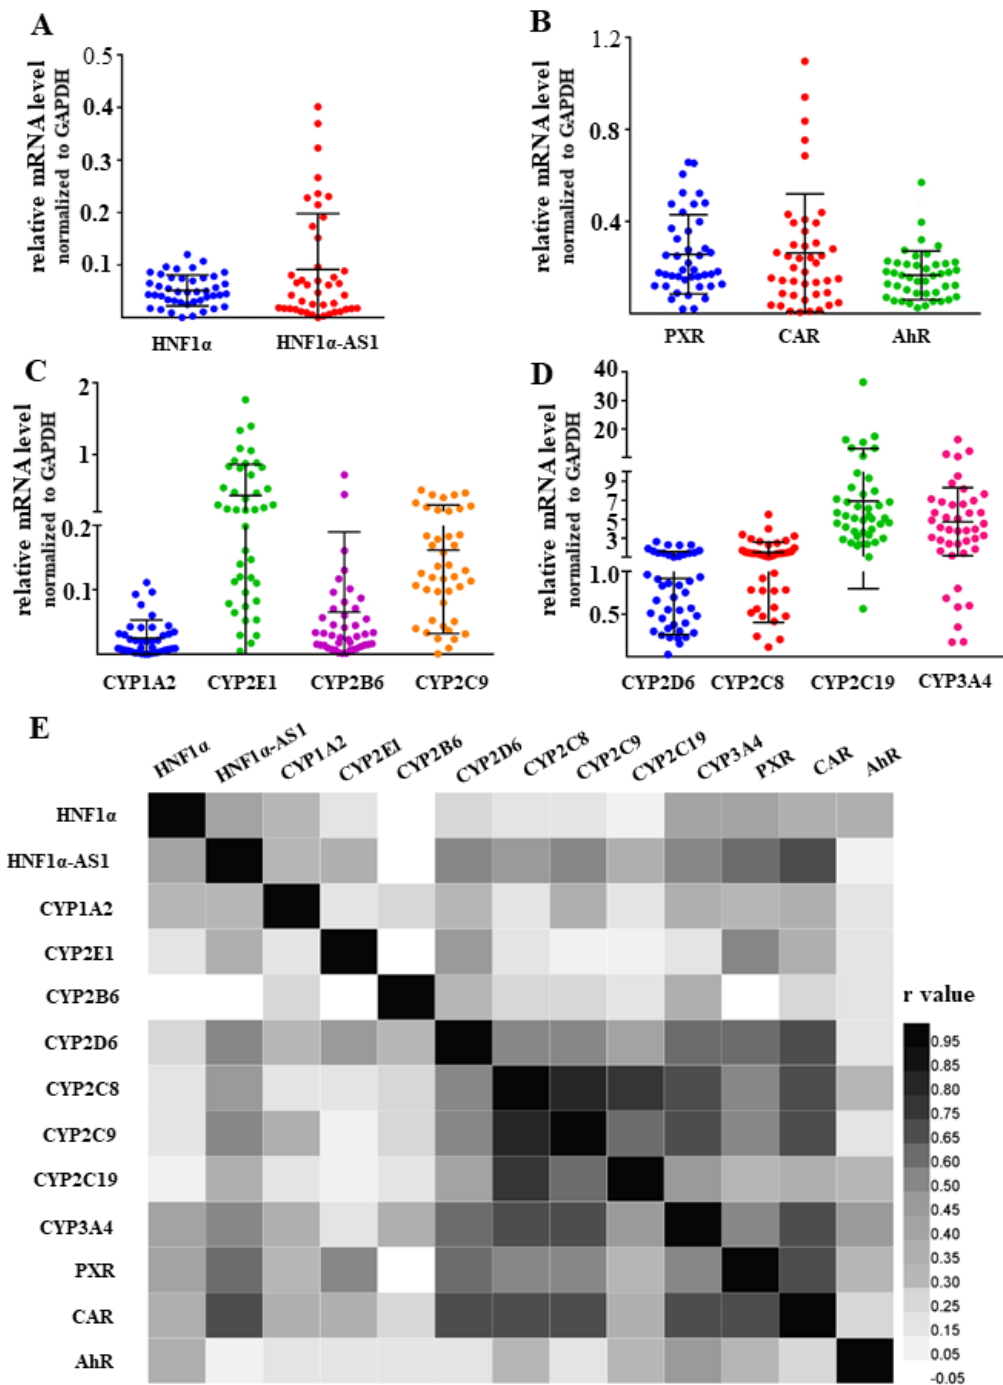

**Supplemental Fig. S2.** The distribution of mRNA expression levels of the tested genes in the 43 human liver tissue samples. (A) The mRNA levels of HNF1 $\alpha$  and HNF1 $\alpha$ -AS1. (B) The mRNA levels of PXR, CAR, and AhR. (C) The mRNA levels of CYP1A2, 2E1, 2B6, and 2C9. (D) The mRNA levels of CYP2D6, 2C8, 2C9, and 3A4. (E) A heat map of the correlation coefficients ( $r$ ) for the mRNA expression levels of different genes, which are calculated by two-tailed Pearson's correlation analysis.

**Supplemental Table S2. Pearson's correlation analysis of the expression between HNF1 $\alpha$ /HNF1 $\alpha$ -AS1 and CYPs as well as transcription regulators**

|                    | HNF1 $\alpha$ | HNF1 $\alpha$ -AS1 | CYP1A2 | 2E1     | 2B6    | 2D6     | 2C8     | 2C9     | 2C19    | 3A4     | PXR     | CAR   | AhR |
|--------------------|---------------|--------------------|--------|---------|--------|---------|---------|---------|---------|---------|---------|-------|-----|
| HNF1 $\alpha$      | 1             |                    |        |         |        |         |         |         |         |         |         |       |     |
| HNF1 $\alpha$ -AS1 | 0.447**       | 1                  |        |         |        |         |         |         |         |         |         |       |     |
| CYP1A2             | 0.318*        | 0.301              | 1      |         |        |         |         |         |         |         |         |       |     |
| CYP2E1             | 0.216         | 0.391**            | 0.243  | 1       |        |         |         |         |         |         |         |       |     |
| CYP2B6             | 0.035         | -0.033             | 0.298  | -0.036  | 1      |         |         |         |         |         |         |       |     |
| CYP2D6             | 0.294         | 0.539**            | 0.342* | 0.473** | 0.325* | 1       |         |         |         |         |         |       |     |
| CYP2C8             | 0.211         | 0.498**            | 0.153  | 0.194   | 0.281  | 0.598** | 1       |         |         |         |         |       |     |
| CYP2C9             | 0.203         | 0.535**            | 0.375* | 0.087   | 0.280  | 0.563** | 0.819** | 1       |         |         |         |       |     |
| CYP2C19            | 0.093         | 0.360*             | 0.170  | 0.129   | 0.182  | 0.432** | 0.784** | 0.631** | 1       |         |         |       |     |
| CYP3A4             | 0.429**       | 0.503**            | 0.385* | 0.248   | 0.368* | 0.616** | 0.713** | 0.651** | 0.458** | 1       |         |       |     |
| PXR                | 0.416**       | 0.602**            | 0.334* | 0.519** | 0.049  | 0.618** | 0.532** | 0.504** | 0.312*  | 0.594** | 1       |       |     |
| CAR                | 0.351*        | 0.676**            | 0.385* | 0.398** | 0.274  | 0.715** | 0.663** | 0.716** | 0.362*  | 0.654** | 0.738** | 1     |     |
| AhR                | 0.355*        | 0.117              | 0.208  | 0.174   | 0.179  | 0.225   | 0.299   | 0.221   | 0.328*  | 0.458** | 0.299   | 0.279 | 1   |

Pearson's correlation analysis, \* $p$ <0.05, \*\* $p$ <0.01.

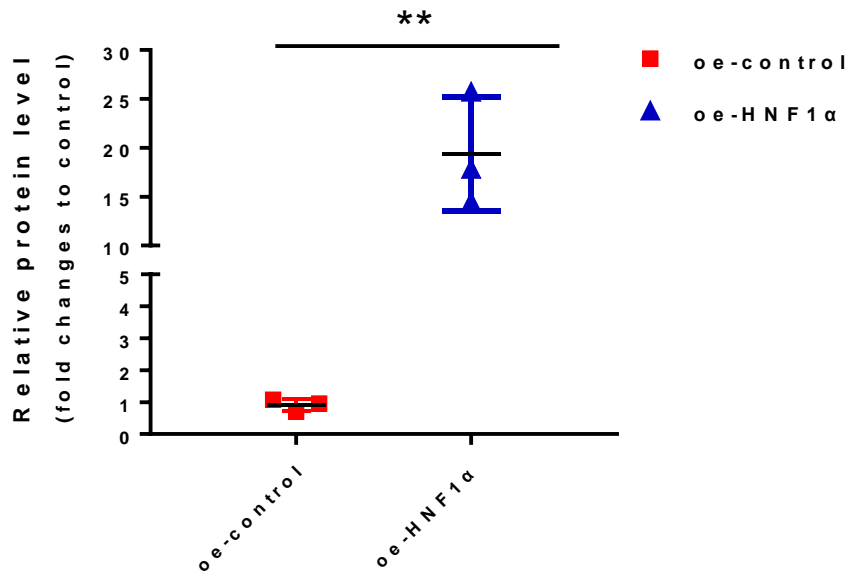

**Supplemental Fig. S3.** The protein levels of HNF1 $\alpha$  in control and HNF1 $\alpha$ -overexpression Huh7 cells.

**Supplemental Table S3. Information of liver tissue donors**

| Sample number | Age  | Sex | Race | Condition                |
|---------------|------|-----|------|--------------------------|
| A01           | 42 y | M   | CH   | Colorectal metastasis    |
| A02           | 51 y | M   | CH   | Hepatocellular carcinoma |
| A03           | 46 y | F   | CH   | Hepatic multiple cyst    |
| A04           | 67 y | M   | CH   | Gallbladder carcinoma    |
| A05           | 48 y | F   | CH   | Gallbladder carcinoma    |
| A06           | 63 y | F   | CH   | Hepatocellular carcinoma |
| A07           | 48 y | F   | CH   | Hepatic hemangioma       |
| A08           | 59 y | M   | CH   | Gallbladder carcinoma    |
| A09           | 54 y | M   | CH   | Cholangiocarcinoma       |
| A10           | 58 y | F   | CH   | Hepatolith               |
| A11           | 56 y | M   | CH   | Hepatic hemangioma       |
| A12           | 50 y | M   | CH   | Hepatocellular carcinoma |
| A13           | 60 y | F   | CH   | Hepatic hemangioma       |
| A14           | 46 y | M   | CH   | Hepatic hemangioma       |
| A15           | 64 y | F   | CH   | Gallbladder carcinoma    |
| A16           | 53 y | M   | CH   | Hepatolith               |
| A17           | 56 y | M   | CH   | Hepatic hemangioma       |
| A18           | 69 y | F   | CH   | Gallbladder carcinoma    |
| A19           | 50 y | F   | CH   | Hepatolith               |
| A20           | 45 y | F   | CH   | Hepatic hemangioma       |
| A21           | 38 y | F   | CH   | Hepatic hemangioma       |

|     |      |   |    |                          |
|-----|------|---|----|--------------------------|
| A22 | 41 y | M | CH | Hepatic hemangioma       |
| A23 | 61 y | F | CH | Gallbladder carcinoma    |
| A24 | 37 y | M | CH | Hepatic hemangioma       |
| A25 | 61 y | F | CH | Hepatic hemangioma       |
| A26 | 53 y | F | CH | Hepatic hemangioma       |
| A27 | 45 y | F | CH | Hepatic hemangioma       |
| A28 | 63 y | M | CH | hepatic metastases       |
| A29 | 49 y | F | CH | Hepatolith               |
| A30 | 63 y | M | CH | Hepatocellular carcinoma |
| A31 | 43 y | F | CH | Hepatic hemangioma       |
| A32 | 53 y | F | CH | Hepatic hemangioma       |
| A33 | 39 y | F | CH | Hepatic hemangioma       |
| A34 | 47 y | F | CH | Hepatic hemangioma       |
| A35 | 66 y | M | CH | Esophageal metastasis    |
| A36 | 41 y | F | CH | Hepatic hemangioma       |
| A37 | 40 y | F | CH | Hepatic hemangioma       |
| A38 | 20 y | F | CH | Hepatic hemangioma       |
| A39 | 59 y | F | CH | Hepatic hemangioma       |
| A40 | 55 y | F | CH | Hepatic hemangioma       |
| A41 | 62y  | F | CH | Hepatolith               |
| A42 | 36y  | F | CH | Hepatolith               |
| A43 | 39y  | M | CH | Hepatic hemangioma       |

*A adult , y years , F female , M man*

**Supplemental Table S4.** Characteristics of donors

| Number of samples | Race | Stage | Age    | Age range | Sex (M:F) |
|-------------------|------|-------|--------|-----------|-----------|
| 43                | CH   | Adult | 51.1 y | 20–69 y   | 16:27     |
